# Supplementary material for: Detection of Inherited Mutations in Brazilian Breast Cancer Patients Using Multi-Gene panel Testing
Source: Research Square preprint supplement (doi:10.21203/rs.3.rs-753679/v1), 2021-07-30
Supplement: Supplementary file 1 [file 19060a036d7b30aaf7293828.xlsx]

## Sheet: Planilha1
Supplementary Table 2. Patients carrying more than one pathogenic variant
Sex	Region of Brazil	Age at BC	IHC	Pathogenic variant 1	Pathogenic variant 2	Pathogenic variant 3
F	South	50	NP	ATM c.1065+1G>T	APC c.3920T>A
F	Southeast	35	NP	ATM c.7876G>C	ATM c.7875_7876delTGinsGC
F	Northeast	42	TN	BRCA1 c.1340_1341insG	CHEK2 c.470T>C
F	Southeast	29	NP	BRCA1 c.2405_2406delTG	MUTYH c.536A>G
F	Southeast	42	NP	BRCA1 c.5030_5033delCTAA	BRCA2 c.6450dupA
F	Centralwest	41	NP	BRCA1 c.5165C>T	MUTYH c.1187G>A
F	South	32	TN	BRCA1 c.5266dupC	TP53 c.1010G>A	PALB2 c.3271C>T
F	Southeast	60	NP	BRCA2 c.2167_2168delAG	BRIP1 c.1941G>C
F	Southeast	51	NP	BRCA2 c.6656C>G	CHEK2 c.349A>G
F	Southeast	33	TN	BRCA2 c.7191dupT	MUTYH c.536A>G
F	Northeast	34	NP	BRCA2 c.8488-1G>A	BLM c.1642C>T
F	South	50	NP	PALB2 c.1424dupC	MUTYH c.1187G>A
F	Southeast	31	NP	PALB2 c.1539dupA	MUTYH c.1187G>A
F	Northeast	57	HR+	PALB2 c.50T>G	ATM c.3272_3273delAG
F	Southeast	65	NP	TP53 c.1010G>A	MUTYH c.1187G>A
F	South	49	NP	TP53 c.1010G>A	MUTYH c.1437_1439delGGA
F	South	31	NP	TP53 c.718A>G	BLM c.3875-2A>G
Abbreviations: BC, breast cancer; F, female; HR+, hormone receptor positive; IHC, immunohistochemistry; NP, not provided; TN, triple negative.
