# Supplementary material for: Detection of Inherited Mutations in Brazilian Breast Cancer Patients Using Multi-Gene panel Testing
Source: Research Square preprint supplement (doi:10.21203/rs.3.rs-753679/v1), 2021-07-30
Supplement: Supplementary file 2 [file 6648a60cc47ad7c8ccc06539.xlsx]

## Sheet: Planilha1
Supplementary Table 1. Pathogenic and likely pathogenic variants per gene in a cohort of breast cancer patients submitted to multi-gene panel test
Gene	Variant	Likely pathogenic	Pathogenic	Total
APC NM_000038.5 CCDS4107.1
	c.3920T>A	4		4
	c.6287C>G	1		1
	Total	5		5
ATM NM_000051.3 CCDS31669.1
	c.1065+1G>T	1		1
	c.1495C>T		1	1
	c.2413C>T		1	1
	c.3272_3273delAG		1	1
	c.3576G>A		1	1
	c.3802delG		4	4
	c.6348-1G>A	1		1
	c.6404dupT		1	1
	c.640delT		3	3
	c.6975G>A	3		3
	c.748C>T		1	1
	c.7630-2A>C		1	1
	c.7789-3T>G		1	1
	c.7875_7876delTGinsGC		2	2
	c.7876G>C		1	1
	c.7886_7890delTATTA		1	1
	c.8264_8268delATAAG		1	1
	c.8292_8293delTG		1	1
	c.8494C>T		1	1
	c.9022C>T		1	1
	c.9023G>A	1		1
	c.9146delT	1		1
	Total	7	23	30
BARD1 NM_000465.3 CCDS2397.1
	c.1758delT	1		1
	c.176_177delAG		4	4
	Total	1	4	5
BLM NM_000057.3 CCDS10363
	c.1642C>T		2	2
	c.2207_2209delATC		1	1
	c.2663-2A>G	1		1
	c.3875-2A>G	1		1
	Total	2	3	5
BRCA1 NM_007294.3 CCDS11453.1
	c.1088delA		1	1
	c.1340_1341insG		1	1
	c.1380_1381insT		1	1
	c.1492delC		1	1
	c.1687C>T		5	5
	c.181T>G		2	2
	c.188T>A		2	2
	c.192T>G	1		1
	c.1962dupG		1	1
	c.1A>G		1	1
	c.2037_2038insC		1	1
	c.211A>G		3	3
	c.2176_2177delCT		1	1
	c.2217dupA		1	1
	c.2405_2406delTG		2	2
	c.2889_2890delTG		1	1
	c.2960dupA		2	2
	c.3257T>G		1	1
	c.3331_3334delCAAG		13	13
	c.3481_3491delGAAGATACTAG		2	2
	c.3598C>T		1	1
	c.3817C>T		1	1
	c.3916_3917delTT		1	1
	c.3G>A	1		1
	c.4065_4068delTCAA		1	1
	c.4183C>T		1	1
	c.4357+1G>T		1	1
	c.4484G>T		2	2
	c.4675+1G>A		1	1
	c.470_471delCT		1	1
	c.4964C>T	1		1
	c.5030_5033delCTAA		1	1
	c.5062_5064delGTT		1	1
	c.5074+2T>C		3	3
	c.5096G>A		1	1
	c.5165C>T	1		1
	c.5266dupC		28	28
	c.5444G>A		1	1
	c.66dupA		1	1
	c.679G>T		1	1
	c.68_69delAG		2	2
	Total	4	91	95
BRCA2 NM_000059.3 CCDS9344.1
	c.1813delA		1	1
	c.1813dupA		3	3
	c.2167_2168delAG	1		1
	c.2376C>G		1	1
	c.2808_2811delACAA		5	5
	c.289G>T		1	1
	c.2T>G		3	3
	c.3264dupT		1	1
	c.425G>T	1		1
	c.4380_4381delTT		1	1
	c.466_467delGA		1	1
	c.4963delT	1		1
	c.517-1G>A		1	1
	c.5216dupA		1	1
	c.5303_5304delTT		1	1
	c.5616_5620delAGTAA		1	1
	c.5720_5723delCTCT		1	1
	c.6037A>T		1	1
	c.6039delA	1		1
	c.6290_6291insTA	1		1
	c.631G>A		1	1
	c.6405_6409delCTTAA		5	5
	c.6450dupA		1	1
	c.6468_6469delTC		1	1
	c.6591_6592delTG		1	1
	c.6656C>G		4	4
	c.7060C>T		1	1
	c.7191dupT		1	1
	c.738delT		1	1
	c.7617+1G>A		1	1
	c.793+1G>A		2	2
	c.8067T>A		1	1
	c.8174G>A		1	1
	c.8243G>A		1	1
	c.8488-1G>A		5	5
	c.8488-2A>C		1	1
	c.8755-1G>A	1		1
	c.9041C>G		1	1
	c.9097delA		1	1
	c.9097dupA		1	1
	c.9154C>T		1	1
	c.9371A>T	1		1
	c.9382C>T		2	2
	c.93G>A		1	1
	c.2498_2506delinsAACAG		1	1
	Total	7	59	66
BRIP1 NM_032043.2 CCDS11631.1
	c.1936-2A>C	1		1
	c.1941G>C	1		1
	c.205+1delG	1		1
	c.2392C>T		1	1
	c.3260dupA	1		1
	Total	4	1	5
CDH1 NM_004360.4 CCDS10869.1
	c.48+1G>A		1	1
	Total		1	1
CHEK2 NM_007194.3 CCDS13844.1
	c.1100delC		2	2
	c.1283C>T		1	1
	c.1361_1362delAA	1		1
	c.1427C>T	3		3
	c.319+2T>A	2		2
	c.349A>G	7		7
	c.433C>T		2	2
	c.470T>C	4		4
	Total	17	5	22
FANCC NM_000136.2 CCDS35071
	c.1393C>T		1	1
	c.456+4A>T		2	2
	Total	0	3	3
MEN1 NM_000244.3 CCDS31600.1
	c.1132C>T	1		1
	Total	1		1
MSH2 NM_000251.2 CCDS1834.1
	c.1147C>T		1	1
	Total		1	1
MUTYH NM_001128425.1 CCDS41321.1
	c.1147delC		1	1
	c.1187G>A		13	13
	c.1437_1439delGGA		1	1
	c.325C>T		1	1
	c.389-1G>C		2	2
	c.536A>G		8	8
	c.545G>A		1	1
	c.736G>T	2		2
	c.934-2A>G	4		4
	Total	6	27	33
NBN NM_002485.4 CCDS6249.1
	c.156_157delTT		1	1
	Total		1	1
NF1 NM_000267.3 CCDS11264.1
	c.2251G>C	1		1
	Total	1		1
PALB2 NM_024675.3 CCDS32406.1
	c.1042C>T		2	2
	c.108+1G>A	1		1
	c.1140_1143delTCTT		1	1
	c.1240C>T		1	1
	c.1424dupC		1	1
	c.1539dupA		1	1
	c.1671_1674delTATT	1		1
	c.2587-1G>C	1		1
	c.3008delA		1	1
	c.3027delT		1	1
	c.3271C>T	2		2
	c.3350G>A	1		1
	c.509_510delGA		1	1
	c.50T>G		2	2
	c.715delA		1	1
	Total	6	12	18
PMS2 NM_000535.6 CCDS5343.1
	c.137G>T	2		2
	Total	2		2
PTEN NM_000314.6 CCDS31238.1
	c.209+2T>C	1		1
	Total	1		1
RAD51C NM_058216.2 CCDS11611.1
	c.404G>A	1		1
	c.656T>C	2		2
	c.709C>T		1	1
	c.890_899delTTGTTCCTGC		2	2
	Total	3	3	6
RAD51D NM_002878.3 CCDS11287.1
	c.694C>T		1	1
	Total		1	1
RECQL NM_002907.3 CCDS31756.1
	c.493_497delAGTTC	1		1
	c.675_676insGATGTAG	1		1
	Total	2		2
TP53 NM_000546.5 CCDS11118.1
	c.1010G>A		26	26
	c.257_279delCACCAGCCCCCTCCTGGCCCCTG		1	1
	c.396G>C	1		1
	c.718A>G	1		1
	c.733G>A		2	2
	c.742C>T		1	1
	c.743G>A		2	2
	c.818G>A		1	1
	c.844C>T		1	1
	c.845G>C	1		1
	Total	3	34	37
Total		72	269	341
